# Supplementary material for: Hydrogen-bond networks in polymorphs and solvates of metallorganic complexes containing ruthenium and aminoamide ligands
Source: Royal Society of Chemistry journal article supplement (doi:10.1039/c3ce41920g), 2013-11-20
Supplement: c3ce41920g.pdf [file c3ce41920g.pdf]

## Supporting Information

### Hydrogen-bond networks in polymorphs and solvates in metallorganic complexes containing ruthenium and aminoamide ligands

Alessia Bacchi, Giulia Cantoni, Domenico Crocco, Matteo Granelli,† Paolo Pagano, Paolo Pelagatti\*

Dipartimento di Chimica, Università degli Studi di Parma, Viale delle Scienze 17/A, 43124 Parma, Italy

† Department of Chemistry, University of Genève, Quai Ernest A. 30, 1205 Genève, Switzerland

\*Paolo Pelagatti, Department of Chemistry, University of Parma, Parco Area Scienze 17/A, 43124 Parma, Italy. Email [paolo.pelagatti@unipr.it](mailto:paolo.pelagatti@unipr.it). Tel. +39 0521 905426. Fax +39 0521 905557

#### Index

|   |                                                                                             |        |
|---|---------------------------------------------------------------------------------------------|--------|
| - | XRPD traces of complex <b>1α</b> (Figure S1)                                                | Page 2 |
| - | XRPD trace of complex <b>2</b> (Figure S2)                                                  |        |
| - | XRPD trace of the ammonia uptake product (Figure S3)                                        | Page 3 |
| - | Comparison between the FTIR spectra of <b>1α</b> and the ammonia uptake product (Figure S4) | Page 3 |
| - | H-reactor used for ammonia uptake                                                           | Page 4 |
| - | <sup>1</sup> H-NMR spectra of the complexes (solution)                                      | Page 4 |

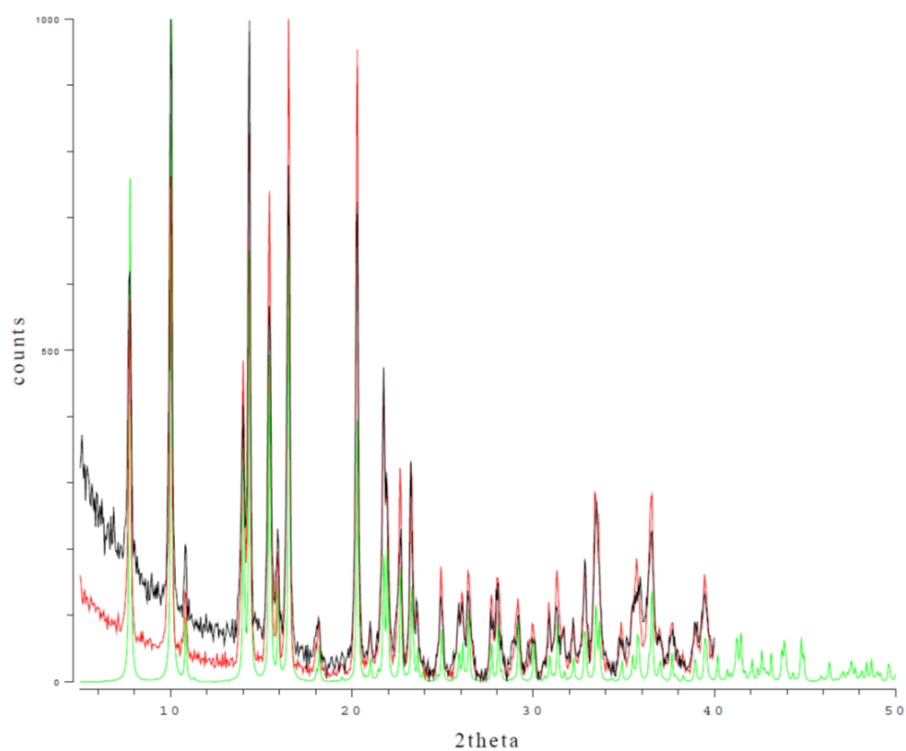

Figure S1 Comparison between the XRPD traces of **1α** synthesized in methanol (red trace), water (black trace) and calculated from X-ray structure (green trace).

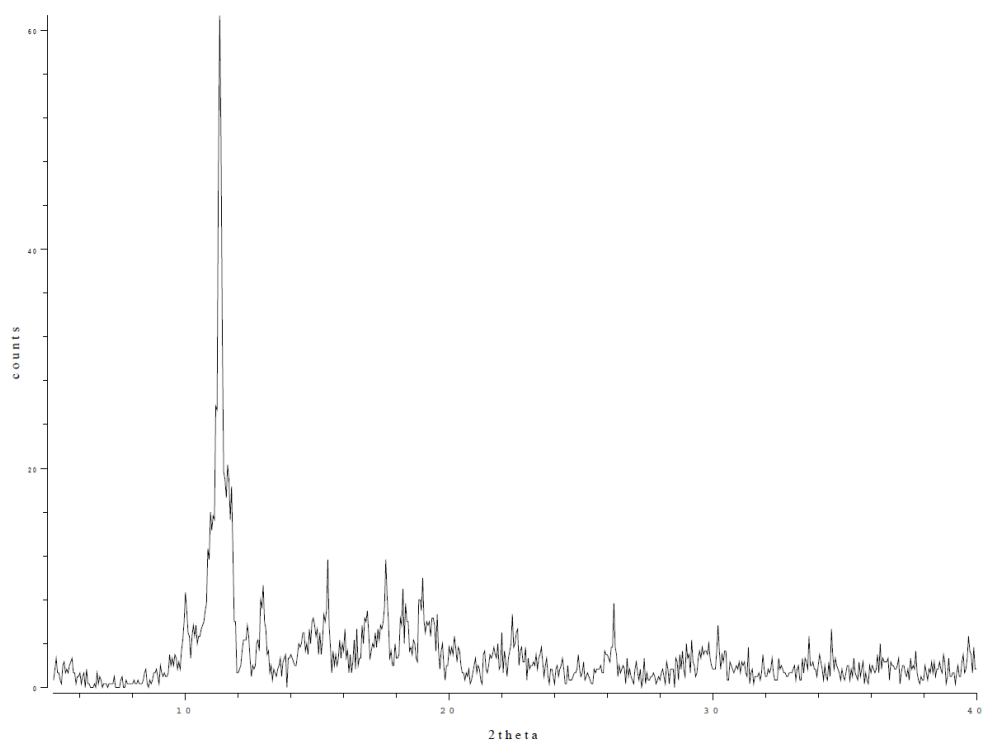

Figure S2 XRPD trace of complex **2**

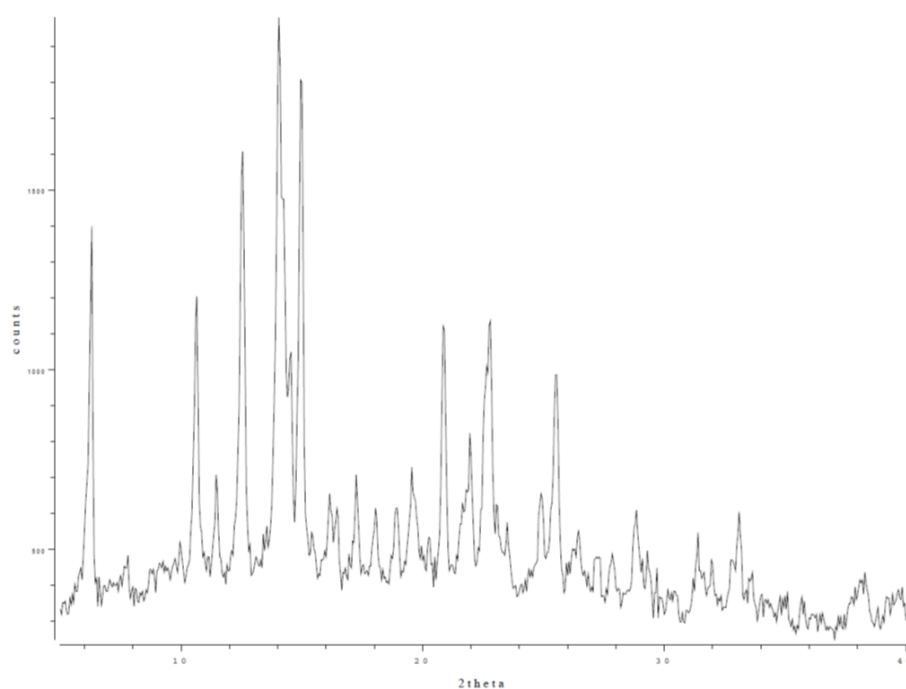

Figure S3 XRPD trace of the yellow microcrystalline solid obtained after exposure of **1α** to vapors of anhydrous ammonia.

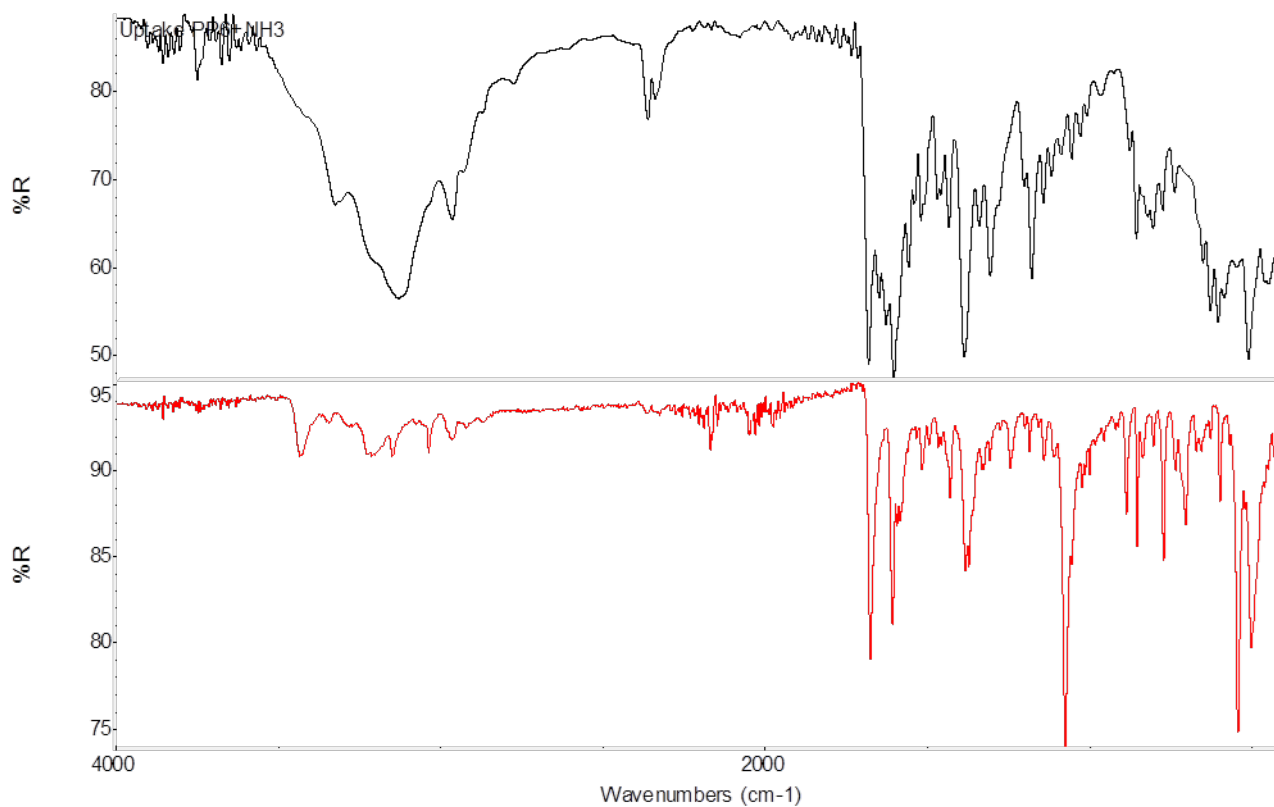

Figure S4 Comparison between the FTIR (ATR) spectra after (black) and before (red) ammonia uptake by complex **1α**.

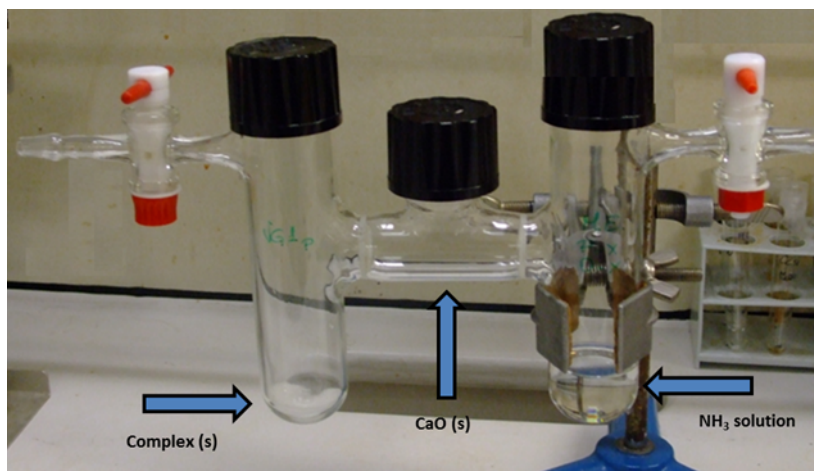

Figure S4 Apparatus used for the ammonia uptake.

### Solution $^1\text{H-NMR}$ data

$^1\text{H}$  NMR spectra were recorded on an AV-300 or an AV-400 MHz Bruker spectrophotometers at 25 °C, the chemical shift values are referred to TMS.  $J$  values are given in Hz.

**[(p-cymene)RuCl<sub>2</sub>(κN-4AB)] (1)**  $\delta_{\text{H}}$  (400MHz; CDCl<sub>3</sub>/one drop of DMSO-d<sub>6</sub>): 7.54 (2H, d, Aniline,  $^3J_{\text{HH}}$  7.2), 6.54 (2H, d, Aniline,  $^3J_{\text{HH}}$  7.2), 5.74 (1H, br, NH), 5.53 (2H, d, p-cymene,  $^3J_{\text{HH}}$  5.4), 5.46 (2H, d, p-cymene,  $^3J_{\text{HH}}$  5.4), 4.33 (1H, br, NH), 2.90 (1H, m, CH(CH<sub>3</sub>)<sub>2</sub>,  $^3J_{\text{HH}}$  6.6), 2.53 (2H, br, NH), 2.13 (3H, s, CH<sub>3</sub>), 1.17 (6H, d, CH(CH<sub>3</sub>)<sub>3</sub>,  $^3J_{\text{HH}}$  6.6).

**[(p-cymene)RuCl<sub>2</sub>(κN-4ABN)] (2·2H<sub>2</sub>O)**  $\delta_{\text{H}}$  (300MHz; CD<sub>2</sub>Cl<sub>2</sub>): 7.95 (3H, br, NH+Aniline), 7.70 (2H, d, Ph,  $^3J_{\text{HH}}$  7.6), 7.43 (3H, t, Aniline+Ph), 7.21 (1H, t, Ph,  $^3J_{\text{HH}}$  7.6), 5.08 (2H, d, p-cymene,  $^3J_{\text{HH}}$  6), 4.94 (2H, d, p-cymene,  $^3J_{\text{HH}}$  6), 4.84 (2H, br, NH<sub>2</sub>), 2.89 (1H, m, CH(CH<sub>3</sub>)<sub>2</sub>), 2.16 (3H, s, CH<sub>3</sub>), 1.28 (6H, d, CH(CH<sub>3</sub>)<sub>2</sub>).

The  $^1\text{H-NMR}$  spectrum of complex **2** was identical to that of complex **2·2H<sub>2</sub>O**.
